# Supplementary material for: Respiratory tract infection-related healthcare utilisation in children with Down’s syndrome
Source: Springer Nature journal article supplement (doi:10.1007/s15010-020-01408-5), 2020-03-14
Supplement: MOESM1 [file 17799170]

## **SUPPLEMENTARY MATERIAL: CODE LISTS**

### **Respiratory Tract Infection Related Healthcare Utilisation in Children with Down's Syndrome**

Journal Name:

Infection

Author Names:

Logan Manikam<sup>1,2</sup>

Monica Lakhanpaul<sup>3</sup>

Anne Schilder<sup>4</sup>

Peter Littlejohns<sup>5</sup>

Emma Alexander<sup>6</sup>

Andrew Hayward<sup>7</sup>

Affiliation:

1 –Institute of Epidemiology and Healthcare, University College London,1-19 Torrington Place, London, WC1E 6BT, UK.

2 – Institute of Health Informatics Research, University College London, 222 Euston Road, London, NW1 2DA, UK.

3 – National Institute of Health Research University College London Hospitals Biomedical Research Centre, 149 Tottenham Court Road, London, W1T 7DN, UK.

4 - evidENT, UCL Ear Institute, 332 Grays Inn Road, London, WC1X 8DA, UK.

5 – Population, Policy & Practice, Great Ormond Street Institute of Child Health, University College London, 30 Guilford Street, London, WC1N 1EH, UK.

6 – Centre for Implementation Science, Institute of Psychiatry, Psychology and Neurosciences, King's College London, 6 De Crespigny Park, Camberwell, London, SE5 8AB, UK.

7 – Paediatric Liver, GI and Nutrition Centre and Mowatlabs, King's College Hospital, Denmark Hill, London, SE5 9RS, UK.

Corresponding Author:

Dr Logan Manikam, [logan.manikam.10@alumni.ucl.ac.uk](mailto:logan.manikam.10@alumni.ucl.ac.uk), UCL Institute of Epidemiology and Healthcare, 1-19 Torrington Place, London, WC1E 6BT, UK.

**Table A 1. Condition and co-morbidities searched using the RCALIBERcodelists package**

| Sub-Category                                                                | Conditions Searched                 | Conditions Not Searched                           | Codes Searched     |
|-----------------------------------------------------------------------------|-------------------------------------|---------------------------------------------------|--------------------|
| <b>Conditions Associated with Breathing Difficulties in Down's Syndrome</b> |                                     |                                                   |                    |
| Respiratory                                                                 | Obstructive sleep apnoea            |                                                   | Sleep Apnoe*       |
|                                                                             | Chronic lung disease                |                                                   | Lung               |
|                                                                             | Tracheostomy                        |                                                   | Trache*            |
|                                                                             |                                     | Subpleural cysts                                  |                    |
| Cardiovascular                                                              | Congenital heart disease            |                                                   | Congenital Heart   |
|                                                                             | Atrioventricular canal defect       |                                                   | Atri*              |
|                                                                             | Atrial & ventricular septal defects |                                                   | Atri* Ventric*     |
|                                                                             | Aortic regurgitation                |                                                   | Regurg*            |
|                                                                             | Patent ductus arteriosus            |                                                   | Duct*              |
|                                                                             | Tetralogy of Fallot                 |                                                   | Fallot             |
|                                                                             | Double outlet right ventricle       |                                                   | Ventric*           |
|                                                                             | Mitral valve prolapse               |                                                   | Valve              |
|                                                                             | Acquired valve disease              |                                                   | Valve              |
| Gastrointestinal                                                            | Gastroesophageal reflux disease     |                                                   | Reflux*            |
|                                                                             | Swallowing dysfunction              |                                                   | Swallow*           |
|                                                                             | Oesophageal atresia repair          |                                                   | Oesophag*          |
|                                                                             | Tracheo-oesophageal fistula         |                                                   | Trache*            |
| Anatomical                                                                  | Tracheal bronchus                   |                                                   | Trache*            |
|                                                                             | Tracheomalacia                      |                                                   | Trache*            |
|                                                                             |                                     | Small jaw                                         |                    |
|                                                                             |                                     | Macroglossia                                      |                    |
|                                                                             |                                     | Narrow nasopharynx                                |                    |
|                                                                             |                                     | Adenotonsillar hypertrophy                        |                    |
|                                                                             |                                     | Choanal stenosis                                  |                    |
|                                                                             |                                     | Laryngomalacia                                    |                    |
|                                                                             |                                     | Narrow trachea                                    |                    |
|                                                                             |                                     | Mid-face hypoplasia                               |                    |
|                                                                             |                                     | Subglottic stenosis                               |                    |
|                                                                             |                                     | Small upper airway                                |                    |
| Contributory factors                                                        |                                     | Obesity                                           |                    |
|                                                                             |                                     | Hypotonia                                         |                    |
| <b>Conditions Associated with Infections in Down's Syndrome</b>             |                                     |                                                   |                    |
| Cancer                                                                      | Acute Leukaemia                     |                                                   | Acute Leukaemi*    |
|                                                                             | Myeloproliferative disease          |                                                   | Myeloproliferative |
| Misc                                                                        |                                     | Increased mucus secretions                        |                    |
|                                                                             |                                     | Reduced ciliary beat frequency                    |                    |
|                                                                             |                                     | B-cell function abnormality                       |                    |
|                                                                             |                                     | Decreased neutrophil chemotaxis                   |                    |
|                                                                             |                                     | Thymic abnormalities                              |                    |
|                                                                             |                                     | Alteration of levels of immunoglobulin subclasses |                    |
|                                                                             |                                     | Alterations in response to vaccinations           |                    |
|                                                                             |                                     | Reduced T and B lymphocyte subpopulations         |                    |

Ciliary dysfunction

| <b>Population: Down's Syndrome</b> |                                      |                         |          |
|------------------------------------|--------------------------------------|-------------------------|----------|
| Down's Syndrome                    | Down's Syndrome                      | Down Trisomy Mongol     |          |
| <b>Infections</b>                  |                                      |                         |          |
| URTI                               | Common Cold                          | Common upper infection  |          |
|                                    | Rhinitis                             | Acute rhinitis          |          |
|                                    | Sinusitis                            | Sinusit* rhinosinusitis |          |
|                                    |                                      | Nasopharyngitis         |          |
|                                    |                                      | Pharyngitis             |          |
|                                    | Epiglottitis                         |                         | Epiglot* |
|                                    |                                      | Laryngitis              |          |
|                                    |                                      | Laryngotracheitis       |          |
|                                    | Tracheitis                           |                         | Trache*  |
|                                    |                                      | Tonsillitis             |          |
|                                    | Otitis Media                         |                         |          |
| LRTI                               | Chest infection                      | Chest Lower resp*       |          |
|                                    | Bronchitis                           | Bronchi*                |          |
|                                    | Bronchiolitis                        | Bronchi*                |          |
|                                    | Croup  Laryngotracheobronchitis      | Croup  Laryngotracheo   |          |
|                                    | Pneumonia                            | Pneumon*                |          |
| SBIs                               | Meningitis                           | Mening*                 |          |
|                                    | Septicaemia                          | Sepsis  Septic*         |          |
|                                    | Endocarditis                         | Endocard*               |          |
|                                    | Abscess                              | Abscess                 |          |
| Other Infections                   | Skin and soft tissue                 | Infect*                 |          |
|                                    | Urinary                              | Infect*                 |          |
|                                    | Gastro                               | Infect*                 |          |
|                                    | TB (All subtypes)                    | Infect*  Lung           |          |
|                                    | Named organism infections w/out site | Infect*                 |          |
|                                    | Otitis externa                       | Infect*                 |          |
|                                    | Bone                                 | Infect*                 |          |

**Table A 2. List of Read codes**

Down's  
Syndrome

|      |                              |
|------|------------------------------|
| Q909 | Down's Syndrome, unspecified |
| 1543 | Down's Syndrome- trisomy 21  |

|       |                                                       |
|-------|-------------------------------------------------------|
| 10759 | Down's Syndrome NOS                                   |
| 19062 | Partial Trisomy Syndromes                             |
| 18415 | Trisomy 21                                            |
| Q929  | Trisomy and partial trisomy of autosomes, unspecified |
| Q901  | Trisomy 21, mosaicism (mitotic nondisjunction)        |
| Q900  | Trisomy 21, meiotic nondisjunction                    |

LRTI

---

|       |          |                                                        |
|-------|----------|--------------------------------------------------------|
| 22448 | POSSIBLE | O/E - intercostal recession                            |
| 25722 | POSSIBLE | O/E - subcostal recession                              |
| 7092  | POSSIBLE | Recurrent wheezy bronchitis                            |
| 152   | POSSIBLE | Wheezy bronchitis                                      |
| 8582  | POSSIBLE | O/E - chest findings                                   |
| 5978  | PROBABLE | Acute wheezy bronchitis                                |
| 13573 | PROBABLE | Influenza with bronchopneumonia                        |
| 8539  | POSSIBLE | O/E - shallow breathing                                |
| 14976 | PROBABLE | Viral pneumonia NOS                                    |
| 5202  | PROBABLE | Viral pneumonia                                        |
| 44425 | PROBABLE | Pleural empyema                                        |
| 7000  | POSSIBLE | O/E - dyspnoea                                         |
| 1934  | PROBABLE | Laryngotracheobronchitis                               |
| 18451 | PROBABLE | Acute bronchiolitis due to respiratory syncytial virus |
| 17359 | PROBABLE | Chest infection - unspecified bronchitis               |
| 10321 | POSSIBLE | O/E - consolidation                                    |
| 41137 | PROBABLE | Acute bronchitis or bronchiolitis NOS                  |
| 8318  | PROBABLE | Lung consolidation                                     |
| 22795 | PROBABLE | Chest infection - other bacterial pneumonia            |
| 3683  | PROBABLE | Basal pneumonia due to unspecified organism            |
| 23095 | PROBABLE | Bacterial pneumonia NOS                                |
| 25694 | PROBABLE | Pneumonia due to other specified organisms             |
| 1576  | PROBABLE | Pneumonia due to mycoplasma pneumoniae                 |
| 3480  | PROBABLE | Bronchitis NOS                                         |
| 3163  | PROBABLE | Tracheobronchitis NOS                                  |
| 10114 | POSSIBLE | O/E - tachypnoea                                       |
| 9639  | PROBABLE | Lobar pneumonia due to unspecified organism            |
| 5324  | PROBABLE | Atypical pneumonia                                     |

|       |          |                                              |
|-------|----------|----------------------------------------------|
| 25571 | POSSIBLE | O/E - coarse crepitations                    |
| 1382  | PROBABLE | Acute viral bronchitis unspecified           |
| 10086 | PROBABLE | Pneumonia and influenza                      |
| 11101 | PROBABLE | Acute tracheobronchitis                      |
| 9062  | POSSIBLE | O/E - crepitations                           |
| 4626  | POSSIBLE | O/E - rhonchi present                        |
| 29669 | PROBABLE | Acute bronchitis and bronchiolitis           |
| 1849  | PROBABLE | Lobar (pneumococcal) pneumonia               |
| 6094  | PROBABLE | Pneumonia or influenza NOS                   |
| 37447 | PROBABLE | Acute lower respiratory tract infection      |
| 886   | PROBABLE | Bronchopneumonia due to unspecified organism |
| 4899  | PROBABLE | Recurrent chest infection                    |
| 978   | PROBABLE | Pleurisy                                     |
| 572   | PROBABLE | Pneumonia due to unspecified organism        |
| 148   | PROBABLE | Bronchitis unspecified                       |
| 6124  | PROBABLE | Acute lower respiratory tract infection      |
| 1019  | PROBABLE | Acute bronchiolitis                          |
| 3358  | PROBABLE | Lower resp tract infection                   |
| 312   | PROBABLE | Acute bronchitis                             |
| 2581  | PROBABLE | Chest infection NOS                          |
| 68    | PROBABLE | Chest infection                              |
| 2375  | PROBABLE | Empyema                                      |

RTI

---

|       |          |                                          |
|-------|----------|------------------------------------------|
| 6475  | POSSIBLE | [D]Respiratory system and chest symptoms |
| 7118  | POSSIBLE | O/E - pyrexia - ? cause                  |
| 5892  | POSSIBLE | O/E - fever                              |
| 16660 | POSSIBLE | O/E - nose crusting                      |
| 4519  | POSSIBLE | H/O: bronchitis                          |
| 1740  | POSSIBLE | Night sweats                             |
| 2389  | POSSIBLE | [D]Pyrexia of unknown origin             |
| 6086  | POSSIBLE | Pyrexia symptoms                         |
| 6484  | POSSIBLE | Temperature symptoms                     |
| 6065  | POSSIBLE | Fever symptoms                           |
| 5859  | POSSIBLE | Feels hot/feverish                       |
| 1020  | POSSIBLE | [D]Fever NOS                             |

|       |          |                                 |
|-------|----------|---------------------------------|
| 24181 | POSSIBLE | Sputum: mucopurulent            |
| 15430 | POSSIBLE | [D]Sputum abnormal - colour     |
| 14804 | POSSIBLE | Sputum appears infected         |
| 1025  | POSSIBLE | Bronchial cough                 |
| 735   | POSSIBLE | [D]Breathlessness               |
| 7707  | POSSIBLE | Cough symptom NOS               |
| 21113 | PROBABLE | Acute respiratory infection NOS |
| 9807  | POSSIBLE | Sputum - symptom                |
| 7708  | POSSIBLE | Productive cough-yellow sputum  |
| 550   | POSSIBLE | Rhinorrhoea                     |
| 7074  | PROBABLE | Respiratory infection NOS       |
| 5896  | POSSIBLE | Dyspnoea - symptom              |
| 5175  | POSSIBLE | Breathlessness symptom          |
| 7773  | POSSIBLE | Productive cough -green sputum  |
| 2931  | POSSIBLE | Difficulty breathing            |
| 3628  | POSSIBLE | Persistent cough                |
| 1234  | POSSIBLE | Productive cough NOS            |
| 4931  | POSSIBLE | Dry cough                       |
| 1429  | POSSIBLE | Breathlessness                  |
| 1160  | POSSIBLE | [D]Cough                        |
| 4822  | POSSIBLE | Shortness of breath             |
| 293   | PROBABLE | Respiratory tract infection     |
| 292   | POSSIBLE | Chesty cough                    |
| 1273  | POSSIBLE | C/O - cough                     |
| 92    | POSSIBLE | Cough                           |

#### URTI

---

|       |          |                                        |
|-------|----------|----------------------------------------|
| 32802 | POSSIBLE | Other upper respiratory tract diseases |
| 2097  | PROBABLE | Nasal cavity and sinus disease NOS     |
| 16986 | POSSIBLE | Nose running                           |
| 8975  | POSSIBLE | Catarrh unspecified                    |
| 11139 | POSSIBLE | Blocked nose                           |
| 1309  | PROBABLE | Nasal infection                        |
| 9483  | POSSIBLE | Sinus congestion                       |
| 1401  | POSSIBLE | Nasal obstruction                      |

|       |          |                                                           |
|-------|----------|-----------------------------------------------------------|
| 7479  | POSSIBLE | Catarrh - eustachian                                      |
| 3821  | POSSIBLE | Rhinitis - acute                                          |
| 3110  | POSSIBLE | Nasal congestion                                          |
| 6481  | POSSIBLE | Nasal symptoms                                            |
| 5765  | POSSIBLE | C/O - catarrh                                             |
| 1513  | PROBABLE | Infection ear                                             |
| 5577  | PROBABLE | Nonsuppurative otitis media + eustachian tube disorders   |
| 731   | POSSIBLE | Otalgia                                                   |
| 5813  | POSSIBLE | Earache symptoms                                          |
| 10781 | PROBABLE | Acute suppurative otitis media tympanic membrane intact   |
| 15774 | PROBABLE | Influenza with laryngitis                                 |
| 16184 | PROBABLE | Streptococcal sore throat with scarlatina NOS             |
| 16147 | POSSIBLE | O/E - purulent ear discharge                              |
| 22131 | POSSIBLE | O/E - tonsils hyperaemic                                  |
| 20372 | PROBABLE | Acute suppurative otitis media NOS                        |
| 97279 | PROBABLE | [X]Influenza+other manifestations, virus not identified   |
| 21012 | PROBABLE | Acute mucoid otitis media                                 |
| 20669 | PROBABLE | Acute suppurative otitis media tympanic membrane ruptured |
| 10641 | PROBABLE | Acute epiglottitis (non strep)                            |
| 17899 | PROBABLE | Acute bacterial pharyngitis                               |
| 20618 | POSSIBLE | O/E - nose discharge                                      |
| 7266  | PROBABLE | O/E - follicular tonsillitis                              |
| 14791 | PROBABLE | Influenza with gastrointestinal tract involvement         |
| 4718  | PROBABLE | Pharyngolaryngitis                                        |
| 8570  | POSSIBLE | O/E - rhinorrhoea                                         |
| 3605  | PROBABLE | Peritonsillar abscess - quinsy                            |
| 10087 | PROBABLE | Acute laryngotracheitis                                   |
| 9973  | PROBABLE | Recurrent acute otitis media                              |
| 15287 | POSSIBLE | Sore throat symptom NOS                                   |
| 4902  | PROBABLE | Streptococcal pharyngitis                                 |
| 6958  | POSSIBLE | Otorrhagia                                                |
| 6620  | PROBABLE | Febrile cold                                              |
| 6498  | POSSIBLE | O/E - tonsils mod. enlarged                               |
| 16388 | PROBABLE | Influenza NOS                                             |
| 18363 | POSSIBLE | O/E - tympanic membrane red                               |

|       |          |                                             |
|-------|----------|---------------------------------------------|
| 5115  | PROBABLE | Acute viral laryngitis unspecified          |
| 5102  | PROBABLE | Serous otitis media NOS                     |
| 19431 | PROBABLE | Croup                                       |
| 15410 | POSSIBLE | Throat symptom NOS                          |
| 10156 | PROBABLE | Acute bacterial tonsillitis                 |
| 18371 | PROBABLE | Acute otitis media with effusion            |
| 3260  | PROBABLE | Acute nasopharyngitis                       |
| 4221  | PROBABLE | Recurrent upper respiratory tract infection |
| 26010 | PROBABLE | Other acute upper respiratory infections    |
| 7021  | PROBABLE | Acute maxillary sinusitis                   |
| 20104 | PROBABLE | Acute tonsillitis NOS                       |
| 9357  | PROBABLE | Acute viral tonsillitis                     |
| 8950  | PROBABLE | Feverish cold                               |
| 20374 | PROBABLE | Acute nonsuppurative otitis media NOS       |
| 1285  | PROBABLE | Laryngotracheitis                           |
| 2984  | PROBABLE | Frontal sinusitis                           |
| 2476  | PROBABLE | Chest cold                                  |
| 5148  | PROBABLE | Acute secretory otitis media                |
| 5947  | PROBABLE | Influenza like illness                      |
| 911   | PROBABLE | Quinsy                                      |
| 1765  | PROBABLE | Streptococcal sore throat                   |
| 1747  | PROBABLE | Recurrent acute tonsillitis                 |
| 9093  | PROBABLE | Pyrexial cold                               |
| 3624  | PROBABLE | Maxillary sinusitis                         |
| 4061  | PROBABLE | Acute follicular tonsillitis                |
| 8496  | PROBABLE | Streptococcal tonsillitis                   |
| 7730  | PROBABLE | Acute serous otitis media                   |
| 386   | POSSIBLE | Throat pain                                 |
| 11499 | PROBABLE | Throat infection - tonsillitis              |
| 5935  | POSSIBLE | O/E - nasal discharge                       |
| 6466  | PROBABLE | Viral sore throat NOS                       |
| 5390  | PROBABLE | Catarrhal otitis media NOS                  |
| 4868  | PROBABLE | Acute viral pharyngitis                     |
| 8980  | POSSIBLE | Influenza-like symptoms                     |
| 5553  | POSSIBLE | Has a sore throat                           |



|       |          |                                             |
|-------|----------|---------------------------------------------|
| 14931 | POSSIBLE | Inflamed throat                             |
| 1134  | PROBABLE | Acute bilateral otitis media                |
| 1390  | POSSIBLE | Snuffles                                    |
| 6014  | POSSIBLE | Sore throat NOS                             |
| 5806  | POSSIBLE | O/E - painful ear                           |
| 407   | PROBABLE | Acute pharyngitis NOS                       |
| 556   | PROBABLE | Influenza                                   |
| 896   | PROBABLE | Nasal catarrh - acute                       |
| 2137  | PROBABLE | Acute suppurative otitis media              |
| 638   | POSSIBLE | Otorrhoea                                   |
| 3694  | PROBABLE | Acute left otitis media                     |
| 4348  | PROBABLE | Acute right otitis media                    |
| 2125  | PROBABLE | Tonsillitis                                 |
| 1257  | PROBABLE | Acute tracheitis                            |
| 6421  | PROBABLE | Viral upper respiratory tract infection NOS |
| 1142  | PROBABLE | Croup                                       |
| 310   | PROBABLE | Throat infection - pharyngitis              |
| 368   | PROBABLE | Common cold                                 |
| 5887  | PROBABLE | Acute non suppurative otitis media          |
| 1246  | PROBABLE | Coryza - acute                              |
| 142   | PROBABLE | Acute laryngitis                            |
| 1474  | PROBABLE | Suppurative and unspecified otitis media    |
| 243   | PROBABLE | Sinusitis                                   |
| 2157  | PROBABLE | Flu like illness                            |
| 893   | PROBABLE | Acute pharyngitis                           |
| 6294  | PROBABLE | Acute upper respiratory tract infection     |
| 980   | PROBABLE | Acute sinusitis                             |
| 267   | PROBABLE | Otitis media NOS                            |
| 404   | POSSIBLE | Throat soreness                             |
| 5755  | POSSIBLE | Sore throat symptom                         |
| 138   | PROBABLE | Acute tonsillitis                           |
| 2637  | PROBABLE | Upper respiratory tract infection NOS       |
| 76    | PROBABLE | Upper respiratory infection NOS             |

|       |                                                       |
|-------|-------------------------------------------------------|
| 39570 | Asthma causes night symptoms 1 to 2 times per month   |
| 38145 | Asthma limits walking on the flat                     |
| 13175 | Asthma disturbs sleep frequently                      |
| 11370 | Asthma confirmed                                      |
| 1555  | Bronchial asthma                                      |
| 7191  | Asthma limiting activities                            |
| 3018  | Mild asthma                                           |
| 4442  | Asthma unspecified                                    |
| 13065 | Moderate asthma                                       |
| 24884 | Asthma causes daytime symptoms 1 to 2 times per week  |
| 7416  | Asthma disturbing sleep                               |
| 31225 | Asthma causes daytime symptoms 1 to 2 times per month |
| 13066 | Asthma - currently dormant                            |
| 233   | Severe asthma attack                                  |
| 26504 | Asthma never restricts exercise                       |
| 16655 | Asthma monitoring admin.                              |
| 19520 | Asthma treatment compliance satisfactory              |
| 232   | Asthma attack                                         |
| 38143 | Asthma never disturbs sleep                           |
| 10274 | Asthma medication review                              |
| 19539 | Asthma monitoring check done                          |
| 5515  | Seen in asthma clinic                                 |
| 13064 | Asthma severity                                       |
| 7378  | Asthma management plan given                          |
| 185   | Acute exacerbation of asthma                          |
| 25707 | Asthma monitor 1st letter                             |
| 13176 | Asthma follow-up                                      |
| 10043 | Asthma annual review                                  |
| 81    | Asthma monitoring                                     |
| 78    | Asthma                                                |

cardiac

---

|       |                                                              |
|-------|--------------------------------------------------------------|
| 8464  | Acute cor pulmonale                                          |
| 39885 | Revision of closure of defect of atrioventricular septum     |
| 50626 | Close defect interventricular septum using pericardial patch |
| 12889 | Percut transluminal prosth occlusion patent ductus arterios  |

|       |                                                              |
|-------|--------------------------------------------------------------|
| 12312 | Pulmonary valve disorders                                    |
| 5058  | Mitral incompetence, non-rheumatic                           |
| 49551 | Tricuspid stenosis and regurgitation, cause unspecified      |
| 3810  | Complete atrioventricular block                              |
| 35372 | Tricuspid regurgitation, non-rheumatic                       |
| 41569 | Other specified catheterisation of heart                     |
| 3169  | Heart valve and adjacent structures operations NOS           |
| 36668 | Closure of patent ductus arteriosus NEC                      |
| 42132 | Ventricular septal defect, unspecified                       |
| 48207 | Other operations on heart                                    |
| 54772 | Other specified ventricular septal defect                    |
| 89256 | Congenital heart disease                                     |
| 30443 | Mitral valve disease NOS                                     |
| 12844 | Repair of tetralogy of Fallot                                |
| 48331 | Primary closure of defect of atrioventricular septum NEC     |
| 4939  | Bacterial endocarditis                                       |
| 20940 | Repair of subaortic stenosis                                 |
| 19188 | Percut translum prosth occlus patent ductus arteriosus (PDA) |
| 63046 | Tetralogy of Fallot NOS                                      |
| 1267  | Mitral valve diseases                                        |
| 30725 | Aortic arch anomalies                                        |
| 84407 | Other operations on ventricles of heart                      |
| 34902 | Closure of defect of interatrial septum                      |
| 10078 | Diseases of mitral and aortic valves                         |
| 1007  | Aortic incompetence alone, cause unspecified                 |
| 48205 | Congenital malforms of cardiac chambers+connections unsp     |
| 6886  | Congenital aortic valve stenosis                             |
| 39810 | Heart wall, septum and chamber operations                    |
| 3301  | Coarctation of aorta                                         |
| 73602 | Repair of atrium NEC                                         |
| 16191 | Closure of defect of interatrial septum NOS                  |
| 9573  | Ligation of patent ductus arteriosus                         |
| 3300  | Bicuspid aortic valve                                        |
| 16539 | Subaortic stenosis                                           |
| 2977  | Mitral valve incompetence                                    |

|       |                                                      |
|-------|------------------------------------------------------|
| 30173 | Valves of heart and adjacent structures operations   |
| 3863  | Cyanotic congenital heart disease NOS                |
| 12775 | Acute and subacute endocarditis                      |
| 15133 | Replacement of aortic valve NEC                      |
| 17088 | H/O: cardiac surgery                                 |
| 10079 | Right heart failure                                  |
| 11878 | Mitral and aortic regurgitation                      |
| 5621  | Other congenital heart anomalies                     |
| 30340 | Closure of defect of unspecified septum of heart     |
| 17328 | Aorta operations                                     |
| 38436 | Closure of defect of atrioventricular septum NOS     |
| 36575 | Closure of defect of interventricular septum         |
| 19019 | Aortic valve disorders NOS                           |
| 18820 | H/O: cardiac anomaly                                 |
| 7342  | Open correction of patent ductus arteriosus (PDA)    |
| 5743  | Valvular heart disease                               |
| 18785 | Heart septal defects                                 |
| 7894  | Plastic repair of mitral valve                       |
| 9498  | Plastic repair of aortic valve                       |
| 4548  | Aortic valve disorders                               |
| 22003 | Regurgitation of unspecified heart valve             |
| 3418  | Paroxysmal ventricular tachycardia                   |
| 73476 | Repair of defect of the atrioventricular septum      |
| 1005  | Aortic regurgitation alone, cause unspecified        |
| 5477  | Correction of tetralogy of Fallot                    |
| 9450  | Mitral valve regurgitation                           |
| 2343  | Aortic stenosis alone, cause unspecified             |
| 247   | Congenital heart anomaly NOS                         |
| 32163 | Closure of defect of atrioventricular septum         |
| 2841  | Implantation of intravenous cardiac pacemaker system |
| 1294  | Mitral valve prolapse                                |
| 6401  | H/O: heart disorder                                  |
| 18395 | Other specified atrial septal defect                 |
| 9286  | Tricuspid regurgitation, cause unspecified           |
| 10187 | Aortic regurgitation, non-rheumatic                  |

|       |                                                        |
|-------|--------------------------------------------------------|
| 1735  | Aortic aneurysm                                        |
| 3520  | Catheterisation of heart NOS                           |
| 7474  | Ostium secundum atrial septal defect                   |
| 3625  | Patent foramen ovale                                   |
| 2427  | Catheterisation of heart                               |
| 44896 | Common atrioventricular-type ventricular septal defect |
| 9011  | Eisenmenger's complex                                  |
| 1536  | Supraventricular tachycardia NOS                       |
| 2727  | Patent ductus arteriosus                               |
| 561   | Mitral regurgitation                                   |
| 3255  | Atrial septal defect NOS                               |
| 246   | Ventricular septal defect                              |

diabetes

---

|       |                                                             |
|-------|-------------------------------------------------------------|
| 14803 | Diabetes mellitus, adult onset, no mention of complication  |
| 85660 | Diabetes type 1 review                                      |
| 8403  | Non-insulin dependent diabetes mellitus - poor control      |
| 30323 | Type 1 diabetes mellitus with persistent proteinuria        |
| 30294 | Type 1 diabetes mellitus with persistent microalbuminuria   |
| 32359 | Perceived control of insulin-dependent diabetes             |
| 11626 | Diabetic retinopathy NOS                                    |
| 26054 | Type 2 diabetes mellitus with persistent proteinuria        |
| 2342  | Diabetic neuropathy                                         |
| 5884  | NIDDM - Non-insulin dependent diabetes mellitus             |
| 1682  | Diabetes mellitus with ketoacidosis                         |
| 55239 | Type 1 diabetes mellitus with gastroparesis                 |
| 18219 | Type II diabetes mellitus                                   |
| 18390 | Type 2 diabetes mellitus with persistent microalbuminuria   |
| 18824 | Diabetic foot examination declined                          |
| 16230 | Diabetes mellitus with neurological manifestation           |
| 10692 | Type 1 diabetes mellitus with ketoacidosis                  |
| 18278 | Insulin treated Type 2 diabetes mellitus                    |
| 1407  | Insulin treated Type 2 diabetes mellitus                    |
| 35383 | Diabetic patient unsuitable for digital retinal photography |
| 17858 | Type 1 diabetes mellitus                                    |
| 11047 | Conversion to insulin                                       |

|       |                                          |
|-------|------------------------------------------|
| 83532 | Diabetes type 2 review                   |
| 18505 | IDDM-Insulin dependent diabetes mellitus |
| 28769 | Diabetic on insulin and oral treatment   |
| 22823 | Diabetic foot examination                |
| 17859 | Type 2 diabetes mellitus                 |
| 13074 | Diabetic diet                            |
| 11471 | Diabetes medication review               |
| 1038  | Insulin dependent diabetes mellitus      |
| 22130 | Diabetes monitoring default              |
| 1647  | Insulin dependent diabetes mellitus      |
| 95994 | Diabetic foot screen                     |
| 9974  | Seen in diabetic eye clinic              |
| 1323  | Diabetic retinopathy                     |
| 506   | Non-insulin dependent diabetes mellitus  |
| 12675 | Diabetes: shared care programme          |
| 7563  | Diabetic on diet only                    |
| 1549  | Type 1 diabetes mellitus                 |
| 8836  | Diabetes management plan given           |
| 4513  | Non-insulin dependent diabetes mellitus  |
| 7069  | Background diabetic retinopathy          |
| 13067 | Diabetic monitoring NOS                  |
| 1684  | Diabetic on oral treatment               |
| 2378  | Diabetic - poor control                  |
| 12506 | Diabetes: practice programme             |
| 608   | Follow-up diabetic assessment            |
| 758   | Type 2 diabetes mellitus                 |
| 711   | Diabetes mellitus                        |
| 2379  | Seen in diabetic clinic                  |
| 6125  | Diabetic annual review                   |
| 3550  | Diabetic monitoring                      |
| 9897  | Diabetes monitoring admin.               |

epilepsy

---

|      |                    |
|------|--------------------|
| 9747 | Epilepsy NOS       |
| 4093 | Status epilepticus |
| 5117 | Grand mal status   |

|       |                                                     |
|-------|-----------------------------------------------------|
| 46603 | Emergency epilepsy treatment since last appointment |
| 4801  | Epileptic seizures - myoclonic                      |
| 22341 | Epilepsy confirmed                                  |
| 18471 | Epileptic seizures - clonic                         |
| 1715  | Epileptic absences                                  |
| 8187  | Tonic-clonic epilepsy                               |
| 6271  | Status epilepticus, unspecified                     |
| 19550 | Epilepsy control good                               |
| 8487  | Myoclonic seizure                                   |
| 5152  | Epileptic seizures - tonic                          |
| 36696 | Epilepsy monitoring NOS                             |
| 2907  | Petit mal (minor) epilepsy                          |
| 3607  | Fit (in known epileptic) NOS                        |
| 11752 | Patient on maximal tolerated anticonvulsant therapy |
| 6983  | Epilepsy monitoring                                 |
| 9326  | Epilepsy medication review                          |
| 11015 | Seizure free >12 months                             |
| 573   | Epilepsy                                            |

thyroid

---

|       |                                              |
|-------|----------------------------------------------|
| 11146 | TSH - thyroid-stimulating hormone deficiency |
| 95885 | Hypothyroidism annual review                 |
| 718   | Subclinical iodine-deficiency hypothyroidism |
| 51481 | Congenital hypothyroidism NOS                |
| 24681 | Thyroid dis.treatment changed                |
| 10097 | Congenital hypothyroidism                    |
| 28735 | Hypothyroidism monitoring administration     |
| 46630 | Hypothyroidism monitoring second letter      |
| 3941  | Hypothyroidism NOS                           |
| 46057 | Hypothyroidism monitoring first letter       |
| 14704 | Thyroid deficiency                           |
| 3290  | Acquired hypothyroidism                      |
| 8268  | Thyroid disease monitoring                   |
| 273   | Hypothyroidism                               |

**Table A 3. List of ICD-10 codes**

## LRTI

---

|      |          |                                                                                             |
|------|----------|---------------------------------------------------------------------------------------------|
| B953 | PROBABLE | Streptococcus pneumoniae as the cause of diseases classified to other chapters              |
| J154 | PROBABLE | Pneumonia due to other streptococci                                                         |
| J121 | PROBABLE | Respiratory syncytial virus pneumonia                                                       |
| J152 | PROBABLE | Pneumonia due to staphylococcus                                                             |
| J851 | PROBABLE | Abscess of lung with pneumonia                                                              |
| J14X | PROBABLE | Pneumonia due to Haemophilus influenzae                                                     |
| J153 | PROBABLE | Pneumonia due to streptococcus, group B                                                     |
| J852 | PROBABLE | Abscess of lung without pneumonia                                                           |
| J158 | PROBABLE | Other bacterial pneumonia                                                                   |
| J168 | PROBABLE | Pneumonia due to other specified infectious organisms                                       |
| J218 | PROBABLE | Acute bronchiolitis due to other specified organisms                                        |
| J159 | PROBABLE | Bacterial pneumonia, unspecified                                                            |
| J188 | PROBABLE | Other pneumonia, organism unspecified                                                       |
| J151 | PROBABLE | Pneumonia due to Pseudomonas                                                                |
| J129 | PROBABLE | Viral pneumonia, unspecified                                                                |
| J209 | PROBABLE | Acute bronchitis, unspecified                                                               |
| B961 | PROBABLE | Klebsiella pneumoniae [K. pneumoniae] as the cause of diseases classified to other chapters |
| J157 | PROBABLE | Pneumonia due to Mycoplasma pneumoniae                                                      |
| J13X | PROBABLE | Pneumonia due to Streptococcus pneumoniae                                                   |
| J210 | PROBABLE | Acute bronchiolitis due to respiratory syncytial virus                                      |
| J180 | PROBABLE | Bronchopneumonia, unspecified                                                               |
| J219 | PROBABLE | Acute bronchiolitis, unspecified                                                            |
| J189 | PROBABLE | Pneumonia, unspecified                                                                      |
| J181 | PROBABLE | Lobar pneumonia, unspecified                                                                |
| J22X | PROBABLE | Unspecified acute lower respiratory infection                                               |

## RTI

---

|      |          |                              |
|------|----------|------------------------------|
| B349 | PROBABLE | Viral infection, unspecified |
| R05X | POSSIBLE | Cough                        |
| R060 | POSSIBLE | Dyspnoea                     |

## URTI

---

|      |          |                                                     |
|------|----------|-----------------------------------------------------|
| J398 | PROBABLE | Other specified diseases of upper respiratory tract |
| J038 | PROBABLE | Acute tonsillitis due to other specified organisms  |



|      |          |                                                                                   |
|------|----------|-----------------------------------------------------------------------------------|
| J019 | PROBABLE | Acute sinusitis, unspecified                                                      |
| J041 | PROBABLE | Acute tracheitis                                                                  |
| J040 | PROBABLE | Acute laryngitis                                                                  |
| J020 | PROBABLE | Streptococcal pharyngitis                                                         |
| H660 | PROBABLE | Acute suppurative otitis media                                                    |
| J208 | PROBABLE | Acute bronchitis due to other specified organisms                                 |
| J030 | PROBABLE | Streptococcal tonsillitis                                                         |
| H709 | PROBABLE | Mastoiditis, unspecified                                                          |
| J028 | PROBABLE | Acute pharyngitis due to other specified organisms                                |
| J101 | PROBABLE | Influenza with other respiratory manifestations, other influenza virus identified |
| H650 | PROBABLE | Acute serous otitis media                                                         |
| H651 | PROBABLE | Other acute nonsuppurative otitis media                                           |
| H920 | POSSIBLE | Otalgia                                                                           |
| J00X | PROBABLE | Acute nasopharyngitis [common cold]                                               |
| J029 | PROBABLE | Acute pharyngitis, unspecified                                                    |
| H921 | POSSIBLE | Otorrhoea                                                                         |
| H659 | PROBABLE | Nonsuppurative otitis media, unspecified                                          |
| H669 | PROBABLE | Otitis media, unspecified                                                         |
| J050 | PROBABLE | Acute obstructive laryngitis [croup]                                              |
| J039 | PROBABLE | Acute tonsillitis, unspecified                                                    |
| J069 | PROBABLE | Acute upper respiratory infection, unspecified                                    |

asthma

---

|      |                               |
|------|-------------------------------|
| J458 | Mixed asthma                  |
| J46X | Status asthmaticus            |
| J450 | Predominantly allergic asthma |
| J459 | Asthma, unspecified           |

cardiac

---

|      |                                                            |
|------|------------------------------------------------------------|
| Q232 | Congenital mitral stenosis                                 |
| Q264 | Anomalous pulmonary venous connection, unspecified         |
| Q238 | Other congenital malformations of aortic and mitral valves |
| Q228 | Other congenital malformations of tricuspid valve          |
| Q201 | Double outlet right ventricle                              |
| Q262 | Total anomalous pulmonary venous connection                |

|      |                                                                                               |
|------|-----------------------------------------------------------------------------------------------|
| Q258 | Other congenital malformations of great arteries                                              |
| Q268 | Other congenital malformations of great veins                                                 |
| I052 | Mitral stenosis with insufficiency                                                            |
| Q282 | Arteriovenous malformation of cerebral vessels                                                |
| I510 | Cardiac septal defect, acquired                                                               |
| Q254 | Other congenital malformations of aorta                                                       |
| I059 | Mitral valve disease, unspecified                                                             |
| I080 | Disorders of both mitral and aortic valves                                                    |
| I083 | Combined disorders of mitral, aortic and tricuspid valves                                     |
| I081 | Disorders of both mitral and tricuspid valves                                                 |
| Q208 | Other congenital malformations of cardiac chambers and connections                            |
| I330 | Acute and subacute infective endocarditis                                                     |
| Q251 | Coarctation of aorta                                                                          |
| I071 | Tricuspid insufficiency                                                                       |
| Q230 | Congenital stenosis of aortic valve                                                           |
| I361 | Nonrheumatic tricuspid (valve) insufficiency                                                  |
| I441 | Atrioventricular block, second degree                                                         |
| Q244 | Congenital subaortic stenosis                                                                 |
| Q231 | Congenital insufficiency of aortic valve                                                      |
| Q221 | Congenital pulmonary valve stenosis                                                           |
| I341 | Mitral (valve) prolapse                                                                       |
| I440 | Atrioventricular block, first degree                                                          |
| Q256 | Stenosis of pulmonary artery                                                                  |
| Q213 | Tetralogy of Fallot                                                                           |
| T825 | Mechanical complication of other cardiac and vascular devices and implants                    |
| Z954 | Presence of other heart-valve replacement                                                     |
| Q233 | Congenital mitral insufficiency                                                               |
| I38X | Endocarditis, valve unspecified                                                               |
| I350 | Aortic (valve) stenosis                                                                       |
| Q219 | Congenital malformation of cardiac septum, unspecified                                        |
| T828 | Other specified complications of cardiac and vascular prosthetic devices, implants and grafts |
| Q249 | Congenital malformation of heart, unspecified                                                 |
| Q257 | Other congenital malformations of pulmonary artery                                            |
| T827 | Infection and inflammatory reaction due to other cardiac and                                  |

|      |                                                        |
|------|--------------------------------------------------------|
|      | vascular devices, implants and grafts                  |
| I351 | Aortic (valve) insufficiency                           |
| I517 | Cardiomegaly                                           |
| I340 | Mitral (valve) insufficiency                           |
| Z952 | Presence of prosthetic heart valve                     |
| Q250 | Patent ductus arteriosus                               |
| I420 | Dilated cardiomyopathy                                 |
| Q218 | Other congenital malformations of cardiac septa        |
| Q211 | Atrial septal defect                                   |
| Q210 | Ventricular septal defect                              |
| I270 | Primary pulmonary hypertension                         |
| Q212 | Atrioventricular septal defect                         |
| Z867 | Personal history of diseases of the circulatory system |

diabetes

---

|      |                                                                                   |
|------|-----------------------------------------------------------------------------------|
| E100 | Insulin-dependent diabetes mellitus                                               |
| E105 | Insulin-dependent diabetes mellitus                                               |
| E115 | Non-insulin-dependent diabetes mellitus                                           |
| E106 | Insulin-dependent diabetes mellitus                                               |
| E143 | Unspecified diabetes mellitus                                                     |
| Y423 | Insulin and oral hypoglycaemic [antidiabetic] drugs                               |
| E116 | Non-insulin-dependent diabetes mellitus                                           |
| E112 | Non-insulin-dependent diabetes mellitus                                           |
| E114 | Non-insulin-dependent diabetes mellitus                                           |
| E111 | Non-insulin-dependent diabetes mellitus                                           |
| E113 | Non-insulin-dependent diabetes mellitus                                           |
| E108 | Insulin-dependent diabetes mellitus                                               |
| O240 | Diabetes mellitus in pregnancy: Pre-existing diabetes mellitus, insulin-dependent |
| E139 | Other specified diabetes mellitus                                                 |
| E101 | Insulin-dependent diabetes mellitus                                               |
| E109 | Insulin-dependent diabetes mellitus                                               |
| E119 | Non-insulin-dependent diabetes mellitus                                           |

epilepsy

---

|      |                                      |
|------|--------------------------------------|
| Y466 | Other and unspecified antiepileptics |
| G408 | Other epilepsy                       |

|      |                                                             |
|------|-------------------------------------------------------------|
| G419 | Status epilepticus, unspecified                             |
| G406 | Grand mal seizures, unspecified (with or without petit mal) |
| G403 | Generalized idiopathic epilepsy and epileptic syndromes     |
| G409 | Epilepsy, unspecified                                       |

thyroid

---

|      |                                              |
|------|----------------------------------------------|
| E02X | Subclinical iodine-deficiency hypothyroidism |
| E038 | Other specified hypothyroidism               |
| E890 | Postprocedural hypothyroidism                |
| E031 | Congenital hypothyroidism without goitre     |
| E039 | Hypothyroidism, unspecified                  |

**Table A 4. Selection process of ethnicity codes from the CALIBER dataset**

| medid | readorid10code | term                                                         | ethnicity              |
|-------|----------------|--------------------------------------------------------------|------------------------|
| 24690 | 957.00         | Pakistani                                                    | Asian_or_Asian_British |
| 12460 | 918.00         | Pakistani or British Pakistani - ethnic category 2001 census | Asian_or_Asian_British |
| 24740 | 958.00         | Bangladeshi                                                  | Asian_or_Asian_British |
| 28888 | 919.00         | Bangladeshi or British Bangladeshi - ethn categ 2001 census  | Asian_or_Asian_British |
| 47997 | 9542.12        | Black West Indian                                            | Asian_or_Asian_British |
| 12482 | 956.00         | Indian                                                       | Asian_or_Asian_British |
| 12414 | 917.00         | Indian or British Indian - ethnic category 2001 census       | Asian_or_Asian_British |
| 25937 | 91FD.00        | Iranian - ethnic category 2001 census                        | Asian_or_Asian_British |
| 12653 | 91A8.00        | British Asian - ethnic category 2001 census                  | Asian_or_Asian_British |
| 12420 | 91F2.00        | Filipino - ethnic category 2001 census                       | Asian_or_Asian_British |
| 56127 | 91F5.00        | Hindu - ethnic category 2001 census                          | Asian_or_Asian_British |
| 12473 | 91F1.00        | Japanese - ethnic category 2001 census                       | Asian_or_Asian_British |
| 64133 | 91A2.00        | Kashmiri - ethnic category 2001 census                       | Asian_or_Asian_British |
| 12730 | 91F3.00        | Malaysian - ethnic category 2001 census                      | Asian_or_Asian_British |
| 26379 | 95A8.00        | Other Asian (NMO)                                            | Asian_or_Asian_British |
| 12513 | 91A.00         | Other Asian background - ethnic category 2001 census         | Asian_or_Asian_British |
| 12668 | 95H.00         | Other Asian ethnic group                                     | Asian_or_Asian_British |
| 28935 | 91AA.00        | Other Asian or Asian unspecified ethnic category 2001 census | Asian_or_Asian_British |
| 12608 | 91A4.00        | Sri Lankan - ethnic category 2001 census                     | Asian_or_Asian_British |
| 25411 | 95C.00         | Vietnamese                                                   | Asian_or_Asian_British |
| 47950 | 9542.11        | Black Caribbean                                              | Black_or_Black_British |
| 12432 | 91B.00         | Caribbean - ethnic category 2001 census                      | Black_or_Black_British |
| 12350 | 91C.00         | African - ethnic category 2001 census                        | Black_or_Black_British |
| 35412 | 9544.00        | Black - other African country                                | Black_or_Black_British |
| 12778 | 953.00         | Black African                                                | Black_or_Black_British |
| 46812 | 9543.11        | Black North African                                          | Black_or_Black_British |
| 25451 | 91FF.00        | Moroccan - ethnic category 2001 census                       | Black_or_Black_British |
| 32886 | 91D1.00        | Nigerian - ethnic category 2001 census                       | Black_or_Black_British |
| 47028 | 91FA.00        | North African - ethnic category 2001 census                  | Black_or_Black_British |
| 12443 | 91D0.00        | Somali - ethnic category 2001 census                         | Black_or_Black_British |
| 12452 | 9541.00        | Black British                                                | Black_or_Black_British |
| 40097 | 91D2.00        | Black British - ethnic category 2001 census                  | Black_or_Black_British |
| 57753 | 9545.11        | Black East African Asian                                     | Black_or_Black_British |
| 24339 | 954.00         | Black, other, non-mixed origin                               | Black_or_Black_British |
| 47969 | 95A5.00        | Other African countries (NMO)                                | Black_or_Black_British |
| 32165 | 9552.00        | Other Black - Black/Asian orig                               | Black_or_Black_British |
| 32389 | 91D.00         | Other Black background - ethnic category 2001 census         | Black_or_Black_British |
| 46047 | 91D4.00        | Other Black or Black unspecified ethnic category 2001 census | Black_or_Black_British |
| 32136 | 955.00         | Other black ethnic group                                     | Black_or_Black_British |
| 24962 | 95A4.00        | N African Arab/Iranian (NMO)                                 | Black_or_Black_British |
| 35350 | 9547.00        | Black - other Asian                                          | Black_or_Black_British |
| 24272 | 959.00         | Chinese                                                      | Chinese_or_Other_Group |
| 12468 | 91E.00         | Chinese - ethnic category 2001 census                        | Chinese_or_Other_Group |
| 42290 | 91E2.00        | Gypsy/Romany - ethnic category 2001 census                   | Chinese_or_Other_Group |
| 12434 | 91F.00         | Other - ethnic category 2001 census                          | Chinese_or_Other_Group |
| 41214 | 95AD.00        | Other ethnic NEC (NMO)                                       | Chinese_or_Other_Group |
| 12757 | 95J.00         | Other ethnic group                                           | Chinese_or_Other_Group |
| 30280 | 95A.00         | Other ethnic non-mixed (NMO)                                 | Chinese_or_Other_Group |
| 32126 | 95AB.11        | Turkish (NMO)                                                | Chinese_or_Other_Group |
| 12746 | 9129.00        | Turkish - ethnic category 2001 census                        | Chinese_or_Other_Group |
| 32066 | 95AB.00        | Turkish/Turkish Cypriot (NMO)                                | Chinese_or_Other_Group |
| 25676 | 955.00         | Black - other, mixed                                         | Mixed                  |
| 32443 | 95B6.00        | Black African and White                                      | Mixed                  |
| 32425 | 95B5.00        | Black Caribbean and White                                    | Mixed                  |
| 12351 | 910.00         | British or mixed British - ethnic category 2001 census       | Mixed                  |
| 12706 | 9163.00        | Chinese and White - ethnic category 2001 census              | Mixed                  |
| 47077 | 91A3.00        | East African Asian - ethnic category 2001 census             | Mixed                  |
| 46056 | 91A9.00        | Mixed Asian - ethnic category 2001 census                    | Mixed                  |
| 25623 | 9551.00        | Other Black - Black/White orig                               | Mixed                  |
| 12873 | 916.00         | Other Mixed background - ethnic category 2001 census         | Mixed                  |
| 12591 | 912T.00        | Other White or White unspecified ethnic category 2001 census | Mixed                  |
| 32401 | 95B2.00        | Other ethnic, Asian/White orig                               | Mixed                  |
| 12696 | 95B.00         | Other ethnic, mixed origin                                   | Mixed                  |
| 32420 | 95B4.00        | Other ethnic, other mixed orig                               | Mixed                  |
| 12638 | 915.00         | White and Asian - ethnic category 2001 census                | Mixed                  |
| 12437 | 914.00         | White and Black African - ethnic category 2001 census        | Mixed                  |
| 12742 | 913.00         | White and Black Caribbean - ethnic category 2001 census      | Mixed                  |
| 46059 | 91F9.00        | Arab - ethnic category 2001 census                           | Mixed                  |
| 26246 | 91FG.00        | Latin American - ethnic category 2001 census                 | Mixed                  |
| 12756 | 91FH.00        | South and Central American - ethnic category 2001 census     | Mixed                  |
| 26310 | 9514.00        | Other white British ethnic group                             | White                  |
| 12681 | 9122.00        | Welsh - ethnic category 2001 census                          | White                  |
| 12446 | 9510.00        | White British                                                | White                  |
| 98111 | 9100.00        | White British - ethnic category 2001 census                  | White                  |
| 98111 | 9100.00        | White British - ethnic category 2001 census                  | White                  |
| 26467 | 9513.00        | White Scottish                                               | White                  |
| 26391 | 912Q.00        | Mixed Irish and other White - ethnic category 2001 census    | White                  |
| 24837 | 9511.00        | White Irish                                                  | White                  |
| 12402 | 912R.00        | Oth White European/European unsp/Mixed European 2001 census  | White                  |
| 12633 | 95AC.00        | Other European (NMO)                                         | White                  |
| 12421 | 912.00         | Other White background - ethnic category 2001 census         | White                  |
| 12433 | 912G.00        | Baltic Estonian/Latvian/Lithuanian - ethn categ 2001 census  | White                  |
| 28973 | 912H.00        | Commonwealth (Russian) Indep States - ethn categ 2001 census | White                  |
| 28866 | 912M.00        | Croatian - ethnic category 2001 census                       | White                  |
| 12355 | 9127.00        | Greek - ethnic category 2001 census                          | White                  |
| 12769 | 9128.00        | Greek Cypriot - ethnic category 2001 census                  | White                  |
| 46964 | 91FC.00        | Israeli - ethnic category 2001 census                        | White                  |
| 12412 | 912B.00        | Italian - ethnic category 2001 census                        | White                  |
| 26341 | 912J.00        | Kosovan - ethnic category 2001 census                        | White                  |
| 12467 | 912F.00        | Polish - ethnic category 2001 census                         | White                  |
| 24270 | 95A9.00        | Irish (NMO)                                                  | White                  |
| 12532 | 91I.00         | Irish - ethnic category 2001 census                          | White                  |
| 12444 | 9512.00        | Other white ethnic group                                     | White                  |
| 22467 | 951.00         | White                                                        | White                  |
